# Supplementary material for: Torsemide Pharmacometrics in Healthy Adult Populations Including CYP2C9 Genetic Polymorphisms and Various Patient Groups through Physiologically Based Pharmacokinetic-Pharmacodynamic Modeling
Source: MDPI journal article supplement (doi:10.3390/pharmaceutics14122720), 2022-12-05
Supplement: s1 [file s1]

# **Torsemide Pharmacometrics in Healthy Adult Populations Including CYP2C9 Genetic Polymorphisms and Various Patient Groups Through Physiologically Based Pharmacokinetic-Pharmacodynamic Modeling**

**Seung-Hyun Jeong <sup>1,†</sup>, Ji-Hun Jang <sup>2,†</sup> and Yong-Bok Lee <sup>2,\*</sup>**

<sup>1</sup> College of Pharmacy, Sunchon National University, 255 Jungang-ro, Suncheon-si, Jeollanam-do 57922, Republic of Korea

<sup>2</sup> College of Pharmacy, Chonnam National University, 77 Yongbong-ro, Buk-gu, Gwangju 61186, Republic of Korea

\* Correspondence: leeyb@chonnam.ac.kr; Tel.: +82-62-530-2931

† These authors contributed equally to this work and are co-first authors.

**Table S1.** Information on datasets applied for torsemide PBPK-PD modeling.

| Healthy adult population | Reference                  | Description                                                   | Matrix           |
|--------------------------|----------------------------|---------------------------------------------------------------|------------------|
|                          | Jeong et al (2022)*        | A total of 112 male adults (19-29 years)                      | Serum            |
|                          |                            | Oral administration (5, 10, and 20 mg doses of torsemide)     |                  |
|                          |                            | CYP2C9 genetic polymorphism in torsemide's PK                 |                  |
|                          | Vormfelde et al (2004) [1] | A total of 36 adults (19-68 years)                            | Plasma           |
|                          |                            | Oral administration (10 mg dose of torsemide)                 |                  |
|                          |                            | CYP2C9 genetic polymorphism in torsemide's PK                 |                  |
|                          | Barr et al (1990) [2]      | A total of 11 male adults (65-83 years)                       | Plasma           |
|                          |                            | Oral and intravenous administrations (5 mg dose of torsemide) |                  |
|                          | Kramer et al (1994) [3]    | A total of 14 male adults (21-37 years)                       | Plasma and urine |
|                          |                            | Oral administrations (10 mg dose of torsemide)                |                  |

|                              |                                                                                                                                                              |                     |
|------------------------------|--------------------------------------------------------------------------------------------------------------------------------------------------------------|---------------------|
| Vargo et al<br>(1995) [4]    | <p>A total of 16 adults (8 males and 8 females; 39-81 years)</p> <p>Oral and intravenous administrations (10 mg dose of torsemide)</p>                       | Plasma              |
| Schwartz et al<br>(1993) [5] | <p>A total of 12 adults (11 males and 1 female; 38-66 years)</p> <p>Oral and intravenous oral administrations (10 mg dose of torsemide)</p>                  | Plasma and<br>urine |
| Kang et al<br>(2013) [6]     | <p>A total of 28 male adults (23.68 <math>\pm</math> 1.79 years)</p> <p>Oral administration (5 mg dose of torsemide)</p>                                     | Serum               |
| Barbanoj et al<br>(2009) [7] | <p>A total of 16 adults (7 males and 9 females; 20-32 years)</p> <p>Single and multiple (4 repeated dose) oral administrations (10 mg dose of torsemide)</p> | Plasma              |
| Shah et al (2017)<br>[8]     | <p>A total of 10 adults (21-45 years)</p> <p>Oral administrations (20 mg dose of torsemide)</p>                                                              | Plasma and<br>urine |
| Cho et al (2005)<br>[9]      | <p>A total of 28 male adults (average 22.50 years)</p>                                                                                                       | Serum               |

Oral administration (10 mg dose of torsemide)

Spahn et al  
(1990) [10]

A total of 7 adults (4 males and 3 females; 24-51 years)  
  
Intravenous administrations (20 mg dose of torsemide)

Plasma

| <b>CKD patient group</b>       | <b>Reference</b>          | <b>Description</b>                                                                                                                              | <b>Matrix</b>    |
|--------------------------------|---------------------------|-------------------------------------------------------------------------------------------------------------------------------------------------|------------------|
|                                | Gehr et al (1994) [11]    | A total of 24 patients (18 males and 6 females; average 52.8-63.3 years)<br><br>Oral and intravenous administrations (100 mg dose of torsemide) | Plasma and urine |
| <b>Cirrhosis patient group</b> | <b>Reference</b>          | <b>Description</b>                                                                                                                              | <b>Matrix</b>    |
|                                | Schwartz et al (1993) [5] | A total of 12 patients (11 males and 1 female; 38-66 years)<br><br>Oral and intravenous oral administrations (10 mg dose of torsemide)          | Plasma and urine |
| <b>CHF patient group</b>       | <b>Reference</b>          | <b>Description</b>                                                                                                                              | <b>Matrix</b>    |

|                                |                                                                                                                                      |                     |
|--------------------------------|--------------------------------------------------------------------------------------------------------------------------------------|---------------------|
| Vargo et al<br>(1995) [4]      | A total of 16 patients (8 males and 8 females; 39-81 years)<br><br>Oral and intravenous administrations (10 mg dose of torsemide)    | Plasma and<br>urine |
| Vargo et al<br>(1994) [12]     | A total of 16 patients (11 males and 5 females; 41-78 years)<br><br>Oral administration (50, 100, and 200 mg doses of torsemide)     | Urine               |
| Ballester et al<br>(2015) [13] | A total of 10 patients (8 males and 2 females; 63.20 ± 12.44 years)<br><br>Oral administration (10 mg dose of torsemide)             | Plasma              |
| Bleske et al<br>(1998) [14]    | A total of 12 patients<br><br>Oral administration (100 mg dose of torsemide)                                                         | Plasma and<br>urine |
| Kramer et al<br>(1996) [15]    | A total of 8 patients (7 males and 1 female; 44-65 years)<br><br>Intravenous administration (100 mg dose of torsemide)               | Urine               |
| Hariman et al<br>(1994) [16]   | A total of 38 patients (32 males and 6 females; 27-82 years)<br><br>Intravenous administration (5, 10, and 20 mg doses of torsemide) | Urine               |

---

\* means that individual data have been fully collected and applied.

**Table S2.** Information on parameters constituting the PBPK-PD model of torsemide for healthy adults.

| Description                     | Parameter | Value               | Unit | Source       |
|---------------------------------|-----------|---------------------|------|--------------|
| Volume of blood                 | $V_{bl}$  | 5400                | mL   | Literature** |
| Volume of lung                  | $V_{lu}$  | 1200                | mL   | Literature** |
| Volume of kidney                | $V_{ki}$  | 300                 | mL   | Literature** |
| Volume of liver                 | $V_{li}$  | 1500                | mL   | Literature** |
| Volume of GI-tract              | $V_{gi}$  | 2400                | mL   | Literature** |
| Volume of rest of body          | $V_{rb}$  | $6.243 \times 10^4$ | mL   | Estimated*** |
| Blood flow rate of blood vessel | $Q_{bl}$  | $3.798 \times 10^5$ | mL/h | Literature** |
| Blood flow rate to lung         | $Q_{lu}$  | $3.798 \times 10^5$ | mL/h | Literature** |
| Blood flow rate to kidney       | $Q_{ki}$  | $7.44 \times 10^4$  | mL/h | Literature** |
| Blood flow rate to GI-tract     | $Q_{gi}$  | $6.6 \times 10^4$   | mL/h | Literature** |
| Blood flow rate to rest of body | $Q_{rb}$  | $1.524 \times 10^5$ | mL/h | Estimated*** |

|                                       |                   |                    |                    |              |
|---------------------------------------|-------------------|--------------------|--------------------|--------------|
| Blood flow rate to liver vein         | $Q_{\text{live}}$ | $1.53 \times 10^5$ | mL/h               | Literature** |
| Blood flow rate to liver artery       | $Q_{\text{liar}}$ | $8.7 \times 10^4$  | mL/h               | Literature** |
| Partition coefficient to lung         | $K_{\text{lu}}$   | 0.23               | -                  | Simulated*   |
| Partition coefficient to kidney       | $K_{\text{ki}}$   | 0.15               | -                  | Simulated*   |
| Partition coefficient to liver        | $K_{\text{li}}$   | 0.11               | -                  | Simulated*   |
| Partition coefficient to GI-tract     | $K_{\text{gi}}$   | 0.18               | -                  | Simulated*   |
| Partition coefficient to rest of body | $K_{\text{rb}}$   | 1.03               | -                  | Simulated*   |
| Unbound fraction in plasma or serum   | $F_r$             | 0.05               | -                  | Literature** |
| Plasma-to-blood cells partition ratio | $P_r$             | 0.28               | -                  | Literature** |
| Maximum metabolic rate constant       | $V_{\text{max}}$  | 1.11               | $\mu\text{g/mL/h}$ | Literature** |
| Michaelis-Menten constant             | $K_m$             | 3.90               | $\mu\text{g/mL}$   | Literature** |
| Oral absorption rate constant         | $K_a$             | 5.50               | 1/h                | Estimated*** |
| Elimination rate constant to urine    | $K_u$             | 18.50              | 1/h                | Estimated*** |

|                                       |       |      |     |              |
|---------------------------------------|-------|------|-----|--------------|
| Elimination rate constant in GI-tract | $K_e$ | 1.00 | 1/h | Estimated*** |
|---------------------------------------|-------|------|-----|--------------|

---

\* indicates values predicted using Simcyp<sup>TM</sup> PBPK Simulator.

\*\* denotes values derived from references [17-22].

\*\*\* means values estimated through fitting between observations and model simulation results.



**Table S3.** Basic physicochemical parameters of torsemide.

| Parameter                | Value | Source      |
|--------------------------|-------|-------------|
| Molecular weight (g/mol) | 348.4 | Literature* |
| Log P                    | 0.57  | Literature* |
| pKa                      | 7.10  | Literature* |

\* denotes values derived from references [23,24].

## References

1. Vormfelde, S.V.; Engelhardt, S.; Zirk, A.; Meineke, I.; Tuchen, F.; Kirchheiner, J.; Brockmöller, J. CYP2C9 polymorphisms and the interindividual variability in pharmacokinetics and pharmacodynamics of the loop diuretic drug torsemide. *Clin. Pharmacol. Ther.* **2004**, *76*, 557-566.
2. Barr, W.; Smith, H.; Karnes, H.; Sica, D.; Vetticaden, S.; Purich, E.; Prasad, V.; Schary, W.; Kramer, W.; Linberg, S. Comparison of bioavailability, pharmacokinetics and pharmacodynamics of torasemide in young and elderly healthy volunteers. *Prog. Pharmacol. Clin. Pharmacol.* **1990**, *8*, 15-28.
3. Kramer, W. Pharmacokinetics and pharmacodynamics of torasemide in congestive heart failure. *Cardiology* **1994**, *84*, 108-114.
4. Vargo, D.L.; Kramer, W.G.; Black, P.K.; Smith, W.B.; Serpas, T.; Brater, D.C. Bioavailability, pharmacokinetics, and pharmacodynamics of torsemide and furosemide in patients with congestive heart failure. *Clin. Pharmacol. Ther.* **1995**, *57*, 601-609.
5. Schwartz, S.; Brater, D.C.; Pound, D.; Green, P.K.; Kramer, W.G.; Rudy, D. Bioavailability, pharmacokinetics, and pharmacodynamics of torsemide in patients with cirrhosis. *Clin. Pharmacol. Ther.* **1993**, *54*, 90-97.
6. Kang, H.-A.; Yoon, H.; Lee, Y.-B. Bioequivalence of Torad tablet 5 mg to Torem tablet 5 mg (torasemide 5 mg). *J. Pharm. Investig.* **2013**, *43*, 153-159.
7. Barbanoj, M.; Ballester, M.; Antonijoan, R.; Gich, I.; Pelagio, P.; Gropper, S.; Santos, B.; Guglietta, A. Comparison of repeated-dose pharmacokinetics of prolonged-release and immediate-release torasemide formulations in healthy young volunteers. *Fundam. Clin. Pharmacol.* **2009**, *23*, 115-125.
8. Shah, S.; Pitt, B.; Brater, D.C.; Feig, P.U.; Shen, W.; Khwaja, F.S.; Wilcox, C.S. Sodium and fluid excretion with torsemide in healthy subjects is limited by the short duration of diuretic action. *J. Am. Heart. Assoc.* **2017**, *6*, e006135.
9. Cho, H.-Y.; Kang, H.-A.; Park, C.-H.; Kim, S.-M.; Kim, D.-H.; Park, S.; Kim, K.-R.; Hur, H.; Lee, Y.-B. Bioequivalence of Boryung torsemide tablet to Torem tablet (torasemide 10 mg) by high performance liquid chromatography/UV detector. *J. Pharm. Investig.* **2005**, *35*, 323-328.

10. Spahn, H.; Knauf, H.; Mutschler, E. Pharmacokinetics of torasemide and its metabolites in healthy controls and in chronic renal failure. *Eur. J. Clin. Pharmacol.* **1990**, *39*, 345-348.
11. Gehr, T.W.; Rudy, D.W.; Matzke, G.R.; Kramer, W.G.; Sica, D.A.; Brater, D.C. The pharmacokinetics of intravenous and oral torsemide in patients with chronic renal insufficiency. *Clin. Pharmacol. Ther.* **1994**, *56*, 31-38.
12. Vargo, D.; Kramer, W.G.; Black, P.K.; Smith, W.B.; Serpas, T.; Brater, D.C. The pharmacodynamics of torsemide in patients with congestive heart failure. *Clin. Pharmacol. Ther.* **1994**, *56*, 48-54.
13. Ballester, M.R.; Roig, E.; Gich, I.; Puentes, M.; Delgadillo, J.; Santos, B.; Antonijoan, R.M. Randomized, open-label, blinded-endpoint, crossover, single-dose study to compare the pharmacodynamics of torasemide-PR 10 mg, torasemide-IR 10 mg, and furosemide-IR 40 mg, in patients with chronic heart failure. *Drug Des. Devel. Ther.* **2015**, *9*, 4291-4302.
14. Bleske, B.E.; Welage, L.S.; Kramer, W.G.; Nicklas, J.M. Pharmacokinetics of torsemide in patients with decompensated and compensated congestive heart failure. *J. Clin. Pharmacol.* **1998**, *38*, 708-714.
15. Kramer, W.G.; Smith, W.B.; Ferguson, J.; Serpas, T.; Grant III, A.G.; Black, P.K.; Brater, D.C. Pharmacodynamics of torsemide administered as an intravenous injection and as a continuous infusion to patients with congestive heart failure. *J. Clin. Pharmacol.* **1996**, *36*, 265-270.
16. Hariman, R.J.; Bremner, S.; Louie, E.K.; Rogers, W.J.; Kostis, J.B.; Nocero, M.A.; Jones, J.P. Dose-response study of intravenous torsemide in congestive heart failure. *Am. Heart J.* **1994**, *128*, 352-357.
17. Davies, B.; Morris, T. Physiological parameters in laboratory animals and humans. *Pharm. Res.* **1993**, *10*, 1093-1095.
18. Igari, Y.; Sugiyama, Y.; Sawada, Y.; Iga, T.; Hanano, M. Prediction of diazepam disposition in the rat and man by a physiologically based pharmacokinetic model. *J. Pharmacokinet. Biopharm.* **1983**, *11*, 577-593.
19. Jeong, S.-H.; Jang, J.-H.; Cho, H.-Y.; Lee, Y.-B. Risk assessment for humans using physiologically based pharmacokinetic model of diethyl phthalate and its major

- metabolite, monoethyl phthalate. *Arch. Toxicol.* **2020**, *94*, 2377-2400.
20. Jeong, S.-H.; Jang, J.-H.; Cho, H.-Y.; Lee, Y.-B. Human risk assessment of di-isobutyl phthalate through the application of a developed physiologically based pharmacokinetic model of di-isobutyl phthalate and its major metabolite mono-isobutyl phthalate. *Arch. Toxicol.* **2021**, *95*, 2385-2402.
  21. Lee, D.Y.; Kim, J.Y.; Kim, Y.C.; Kwon, J.W.; Kim, W.B.; Lee, M.G. Dose-independent pharmacokinetics of torasemide after intravenous and oral administration to rats. *Biopharm. Drug Dispos.* **2005**, *26*, 173-182.
  22. Miners, J.O.; Rees, D.; Valente, L.; Veronese, M.E.; Birkett, D.J. Human hepatic cytochrome P450 2C9 catalyzes the rate-limiting pathway of torsemide metabolism. *J. Pharmacol. Exp. Ther.* **1995**, *272*, 1076-1081.
  23. Knauf, H.; Mutschler, E. Clinical pharmacokinetics and pharmacodynamics of torasemide. *Clin. Pharmacokinet.* **1998**, *34*, 1-24.
  24. Thiel, C.; Schneckener, S.; Krauss, M.; Ghallab, A.; Hofmann, U.; Kanacher, T.; Zellmer, S.; Gebhardt, R.; Hengstler, J.G.; Kuepfer, L. A systematic evaluation of the use of physiologically based pharmacokinetic modeling for cross-species extrapolation. *J. Pharm. Sci.* **2015**, *104*, 191-206.

### Supplementary Figure captions

**Figure S1.** Relationship graph of urinary sodium excretion rate according to urinary torsemide excretion rate in (A) healthy adult groups, (B) cirrhosis, and (C) CHF patient groups.  $R^2$  and AIC mean the model correlation coefficient and model fitting values, respectively. The dark pink and light pink regions mean 95% confidence intervals and 95% prediction intervals, respectively.

**Figure S2.**  $K_p$  values of (A) major tissue and (B) other tissues in humans predicted using Simcyp™ PBPK Simulator and comparison with previously reported values in rats.

**Figure S3.** Plasma or serum concentration profile predicted by the PBPK model and observations following single oral (up) or intravenous (down) exposure to torsemide (5, 10, and 20 mg) in healthy adult groups. Multicolored dots and black solid line represent individual (or mean) observed values and the mean predicted by the model, respectively.

**Figure S4.** Plasma or serum concentration profile predicted by the PBPK model and observations following multiple oral exposures to torsemide (10 mg) in healthy adult group. Yellow dots and black solid line represent observed mean values and the mean predicted by the model, respectively. The red area on the graph represents 95% confidence interval.

**Figure S5.** Cumulative urinary excretion profile predicted by the PBPK model and observations following single oral or intravenous exposure to torsemide (10 and 20 mg) in healthy adult groups. Dots (black or red colored) and black solid line represent observed average values and the mean predicted by the model, respectively.

**Figure S6.** Urinary sodium excretion rate profile predicted by the PBPK-PD model and observations following single (A) oral or (B) intravenous exposure to torsemide (5, 10, and 20 mg) in healthy adult groups. Black dots represent the observed mean values following oral or intravenous exposure of 10 mg torsemide. Black, red, and blue solid lines mean average values at 5, 10, and 20 mg doses predicted by the model, respectively.

**Figure S7.** Comparison graph of dose normalized  $AUC_{0-\infty}$  according to phenotypic combinations of CYP2C9 and OATP1B1. Comparison between EM and IM in the (A) ET population; (B)

Comparison between EM and IM in the IT population; (C) Comparison between ET and IT in the EM population; (D) Comparison between ET, IT, and PT in the IM population. \*,  $p < 0.05$  by Student's  $t$ -test.

**Figure S8.** Plasma or serum concentration profiles of torsemide according to CYP2C9 phenotypes [(A) EM, (B) IM, and (C) PM] in healthy adult populations (following single oral exposure to 5, 10, and 20 mg torsemide). Multicolored dots represent individual observed values or mean values. Black, red, and pink solid lines mean average values at 5, 10, and 20 mg doses predicted by the model, respectively.

**Figure S9.** Prediction of (A) the cumulative urinary excretion amount and (B) urinary sodium excretion rate of torsemide according to CYP2C9 phenotypes after oral administration of 10 mg torsemide. Here, PD prediction (as sodium excretion rate through urine) according to CYP2C9 phenotype was performed based on the PD model for healthy adults.

**Figure S10.** Changes in model parameters by reflecting physiological and biochemical changes according to CP-A, CP-B, and CP-C in the cirrhosis patient group.

**Figure S11.** Plasma or serum concentration (up) and cumulative urinary excretion (down) profiles of torsemide according to severity (as CP-A, CP-B, and CP-C) in cirrhosis patient groups and healthy adult group [following single (A) oral or (B) intravenous exposure to 10 mg torsemide]. Red dots represent observed mean values (in CP-B). Black, red, and blue solid lines mean average values in CP-A, CP-B, and CP-C cirrhosis predicted by the model, respectively. Pink solid line means average values in healthy adult group predicted by the model.

**Figure S12.** Urinary excretion rate profiles of sodium in CP-B cirrhosis patient group [following single (A) oral or (B) intravenous exposure to 10 mg torsemide]. Red dots and solid lines represent observed mean values and average values predicted by the model, respectively. Blue and pink dotted lines mean  $E_0$  values in cirrhotic patients and healthy adult groups, respectively.

**Figure S13.** Prediction of urinary sodium excretion rate according to cirrhosis grade (as CP-A or CP-B or CP-C) after (A) oral or (B) intravenous administration of torsemide at 10 mg. Cyan and

pink dotted lines mean  $E_0$  values in cirrhotic patients and healthy adult groups, respectively.

**Figure S14.** Changes in model parameters by reflecting physiological and biochemical changes according to mild, moderate, and severe CKD.

**Figure S15.** Plasma or serum concentration (up) and cumulative urinary excretion (down) profiles of torsemide according to severity (as mild, moderate, and severe) in CKD patient groups [following single (A) oral or (B) intravenous exposure to 100 mg torsemide]. Dots (red or blue colored) represent observed mean values. Black, red, and blue solid lines mean average values in mild, moderate, and severe CKD predicted by the model, respectively.

**Figure S16.** Changes in model parameters by reflecting physiological and biochemical changes according to mild, moderate, and severe CHF.

**Figure S17.** Plasma or serum concentration-time profiles of torsemide according to severity (as mild, moderate, and severe) in CHF patient groups [following single (A) oral or (B) intravenous exposure to 10 or 100 mg torsemide]. Dots (red or blue colored) represent observed mean values. Black, red, and blue solid lines mean average values in mild, moderate, and severe CHF predicted by the model, respectively.

**Figure S18.** Cumulative urinary excretion-time profiles of torsemide according to severity (as mild, moderate, and severe) in CHF patient groups [following single (A) oral or (B) intravenous exposure to 10-200 mg torsemide]. Dots (red or blue colored) represent observed mean values. Black, red, and blue solid lines mean the average values in mild, moderate, and severe CHF predicted by the model, respectively.

**Figure S19.** Urinary excretion rate profiles of sodium in CHF (A) moderate and (B and C) mild or severe patient groups [following single (A and B) oral exposure to 50-200 mg torsemide or (C) intravenous administration of 5-20 mg torsemide]. Multicolored dots and solid lines represent observed mean values and average values predicted by the model, respectively.

**Figure S20.** Relationship graphs between torsemide PKs and PDs in (A) healthy adults, (B) cirrhosis (CP-B), and (C) CHF (moderate) patients following oral (left) or intravenous (right)

administration of 10 mg torsemide (predicted using the established PBPK-PD model). Three-dimensional relationship (up) between torsemide plasma (or serum) concentration and urinary excretion rate and urinary sodium excretion rate at the same time point are shown. Two-dimensional relationships (medium and down) between torsemide plasma (or serum) concentration or urinary torsemide excretion rate and urinary sodium excretion rate at the same time point are shown. Dots and solid lines mean values predicted by torsemide's PBPK-PD model and connecting those values, respectively.

**Figure S21.** Sensitivity coefficients according to variation of each model parameter based on (A)  $AUC_{0-\infty}$  and (B)  $C_{max}$  of torsemide at doses of 5, 10, 50, 100, and 200 mg.



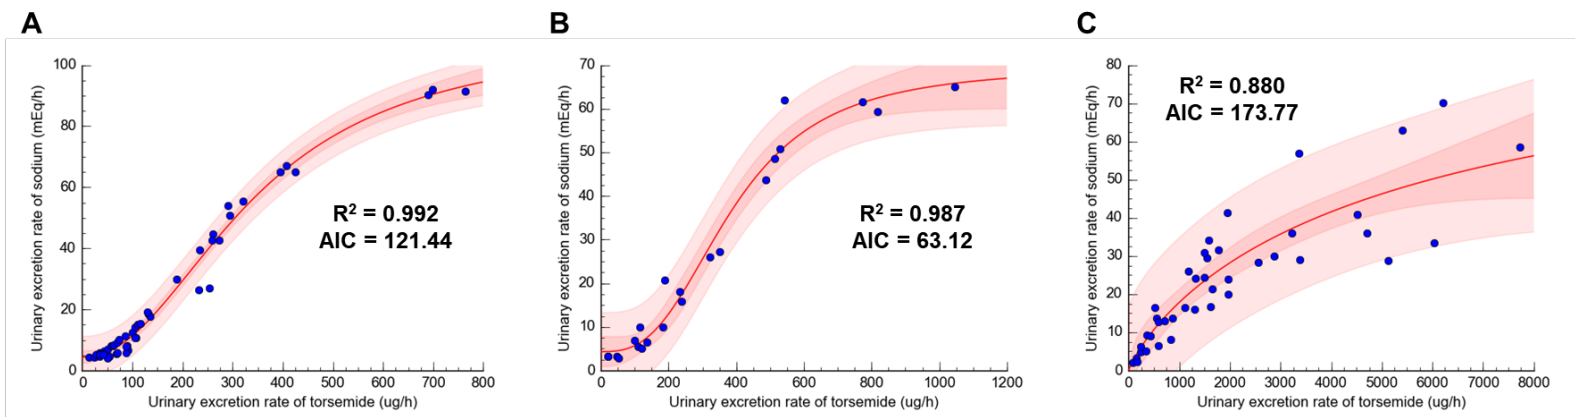

**Figure S1**

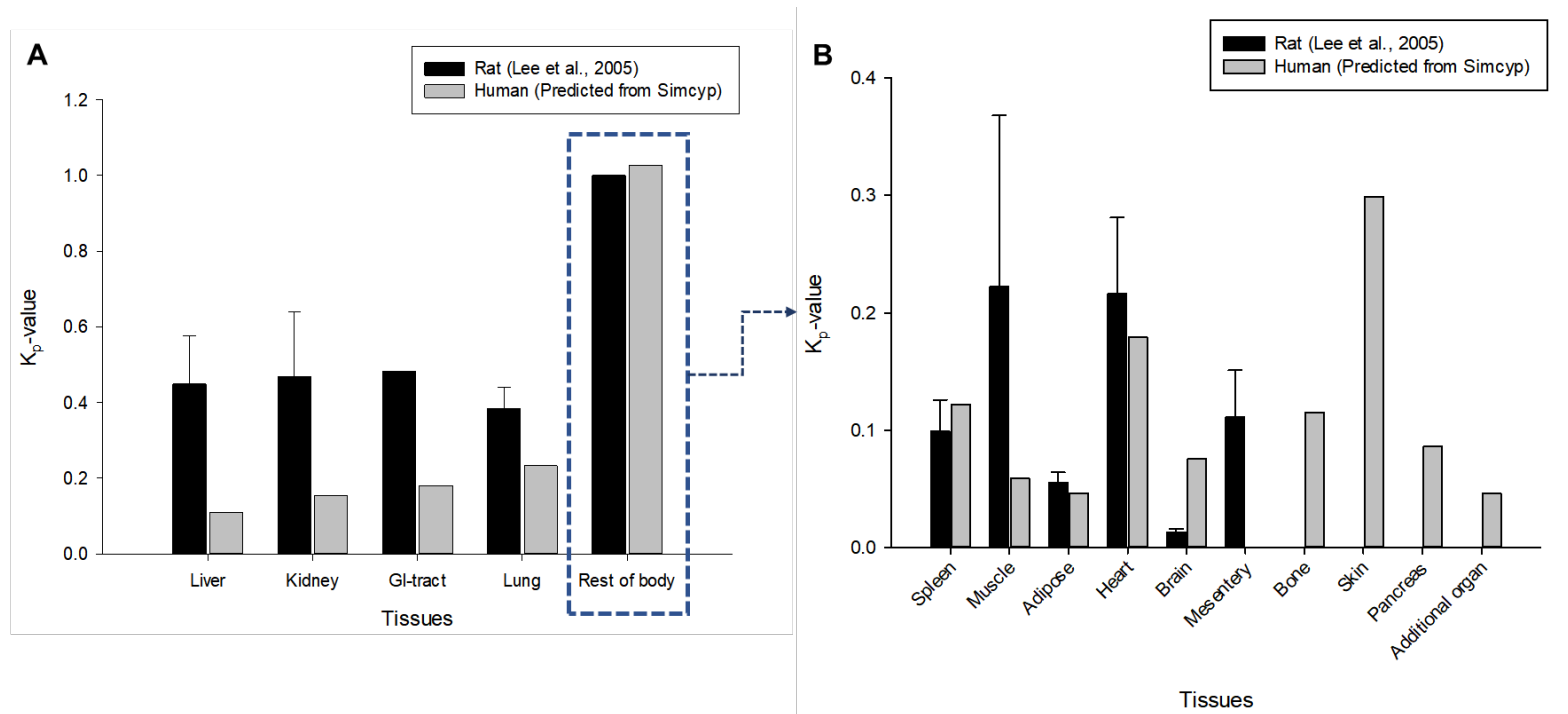

**Figure S2**

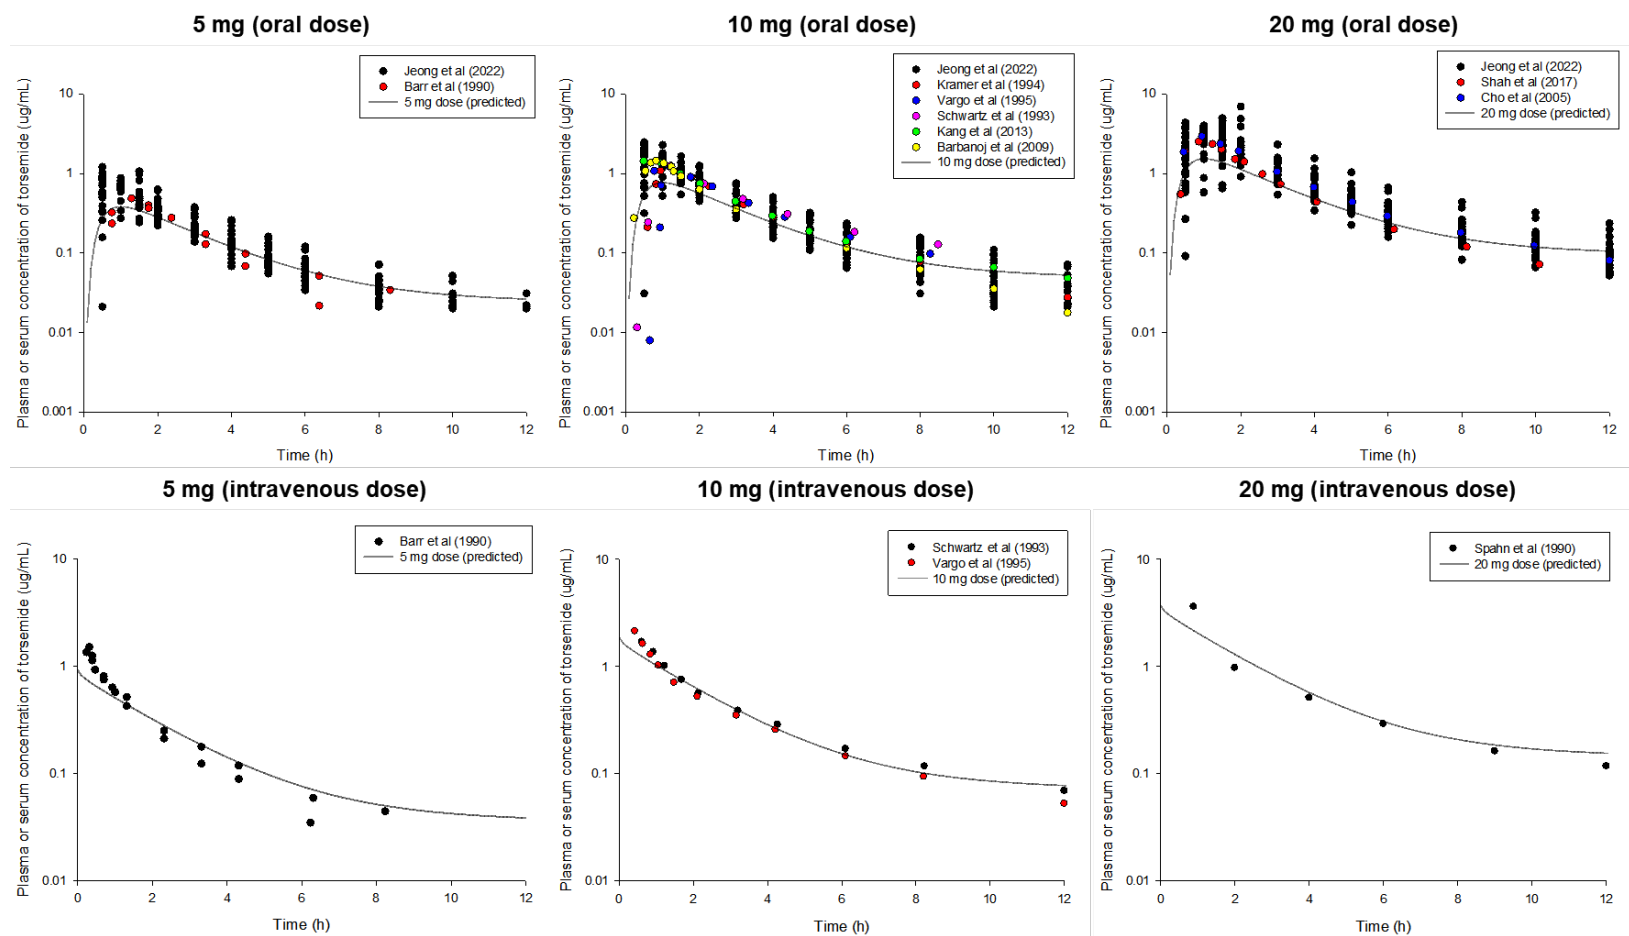

Figure S3

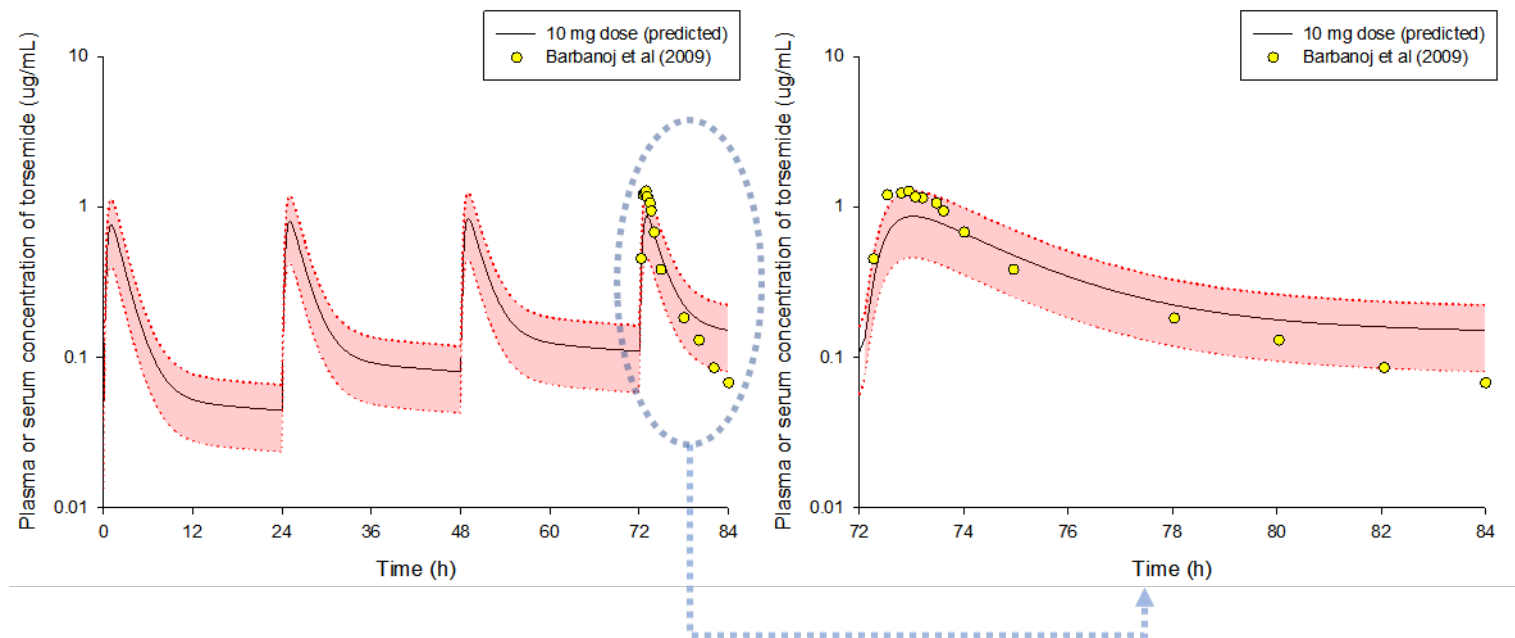

**Figure S4**

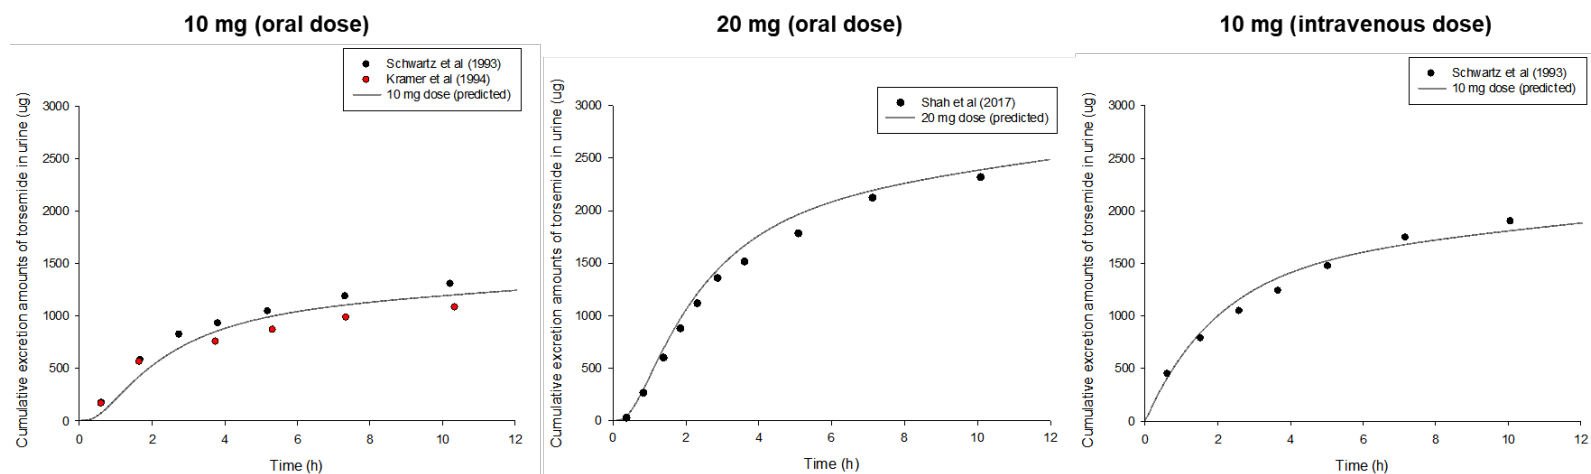

**Figure S5**

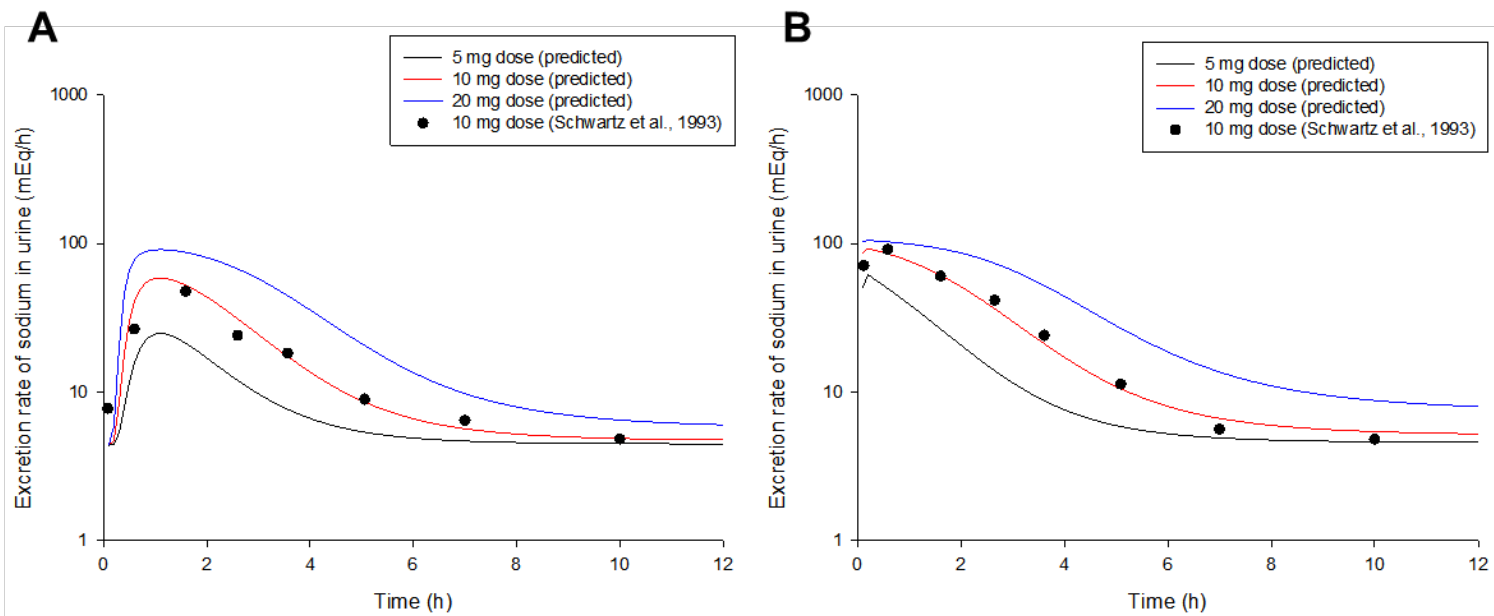

Figure S6

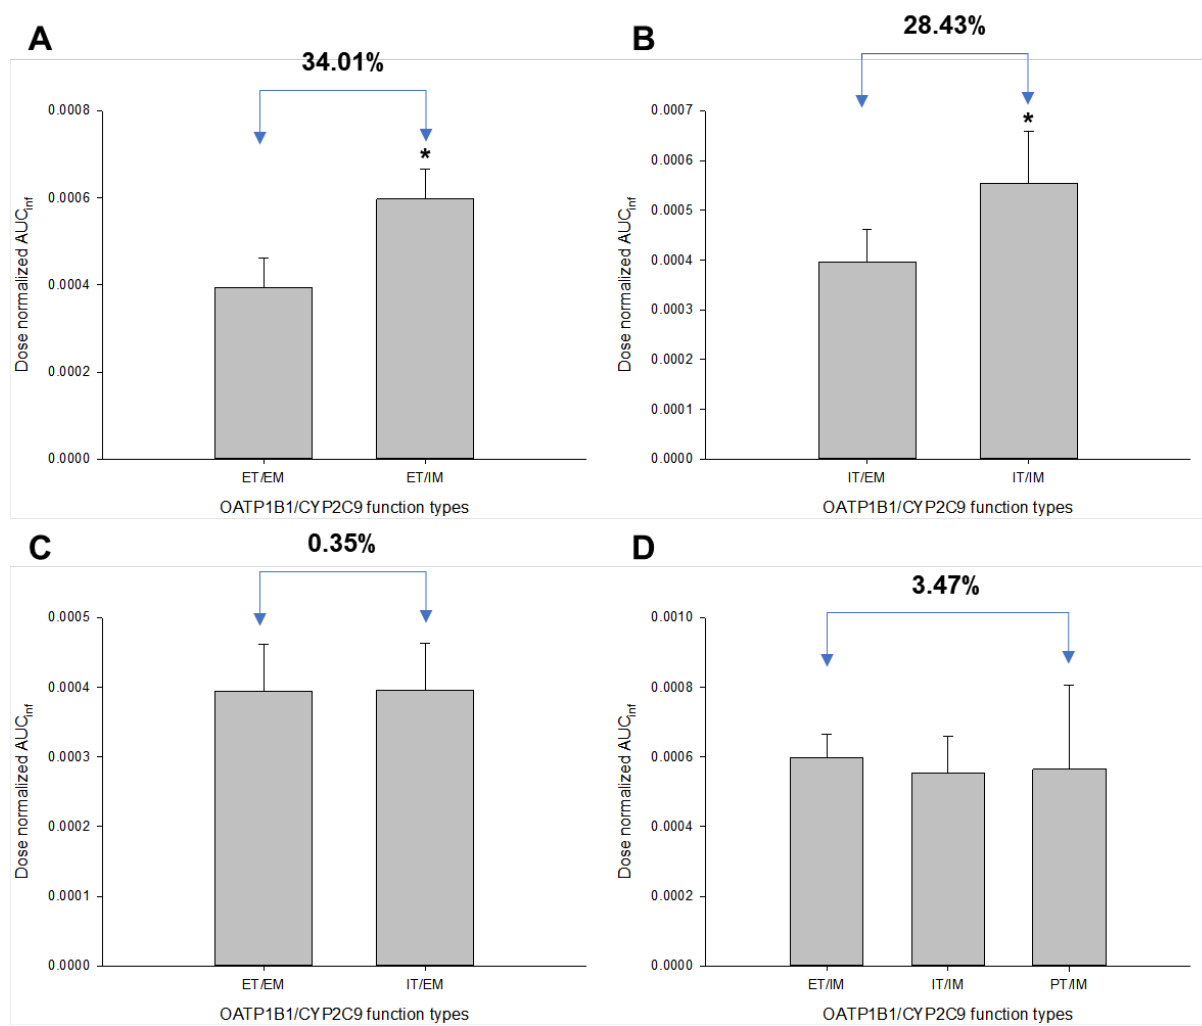

**Figure S7**

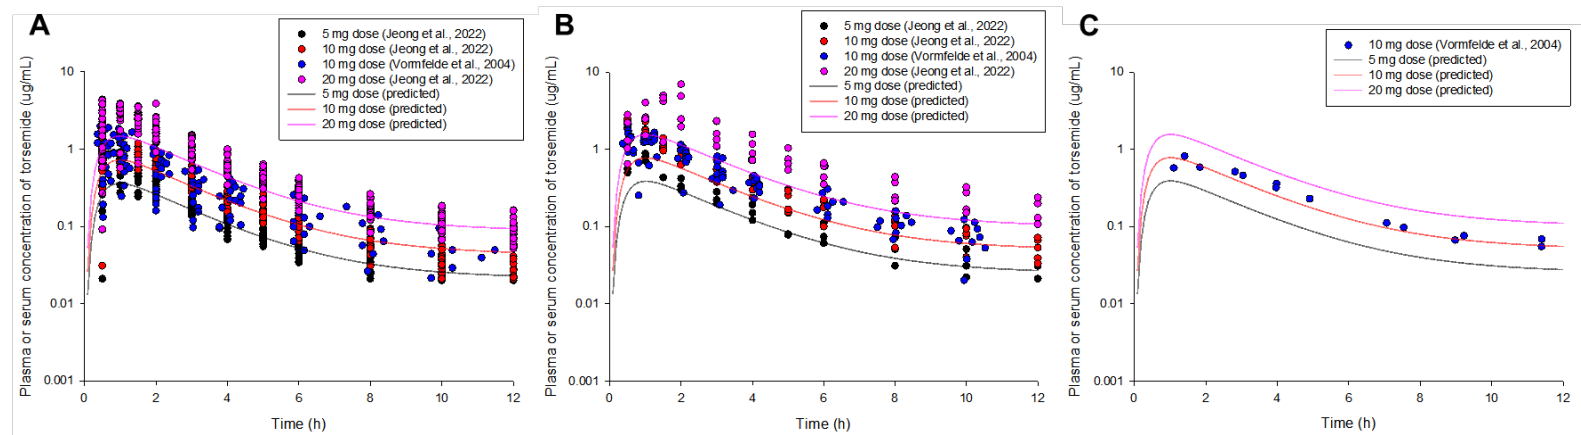

**Figure S8**



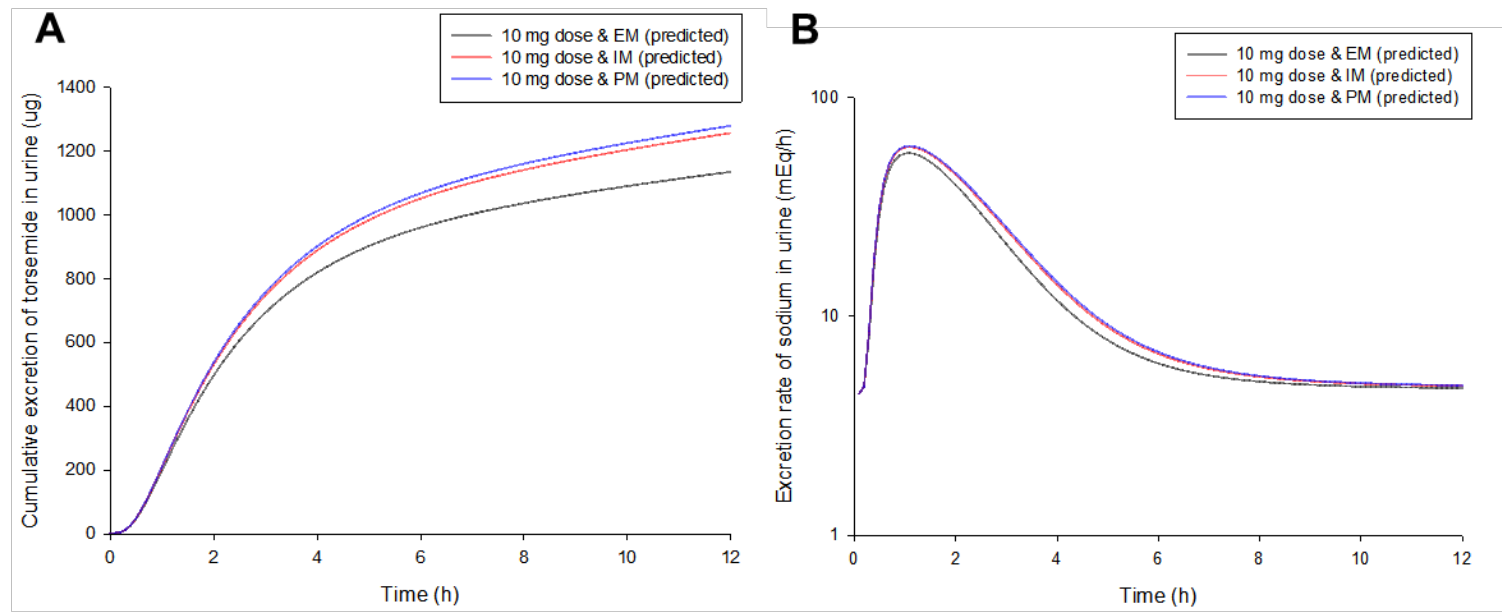

**Figure S9**

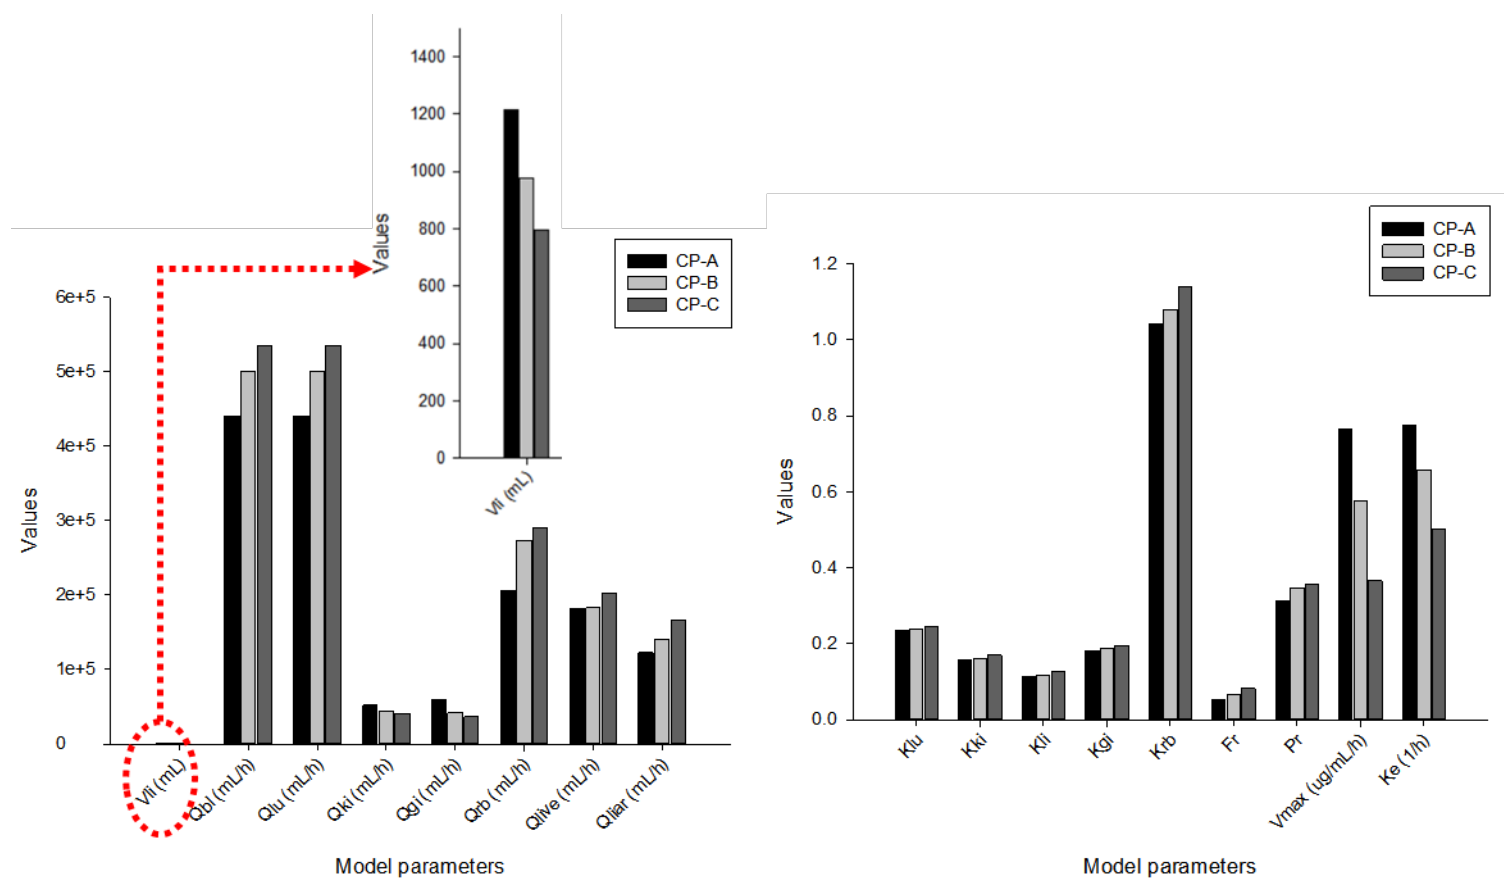

**Figure S10**

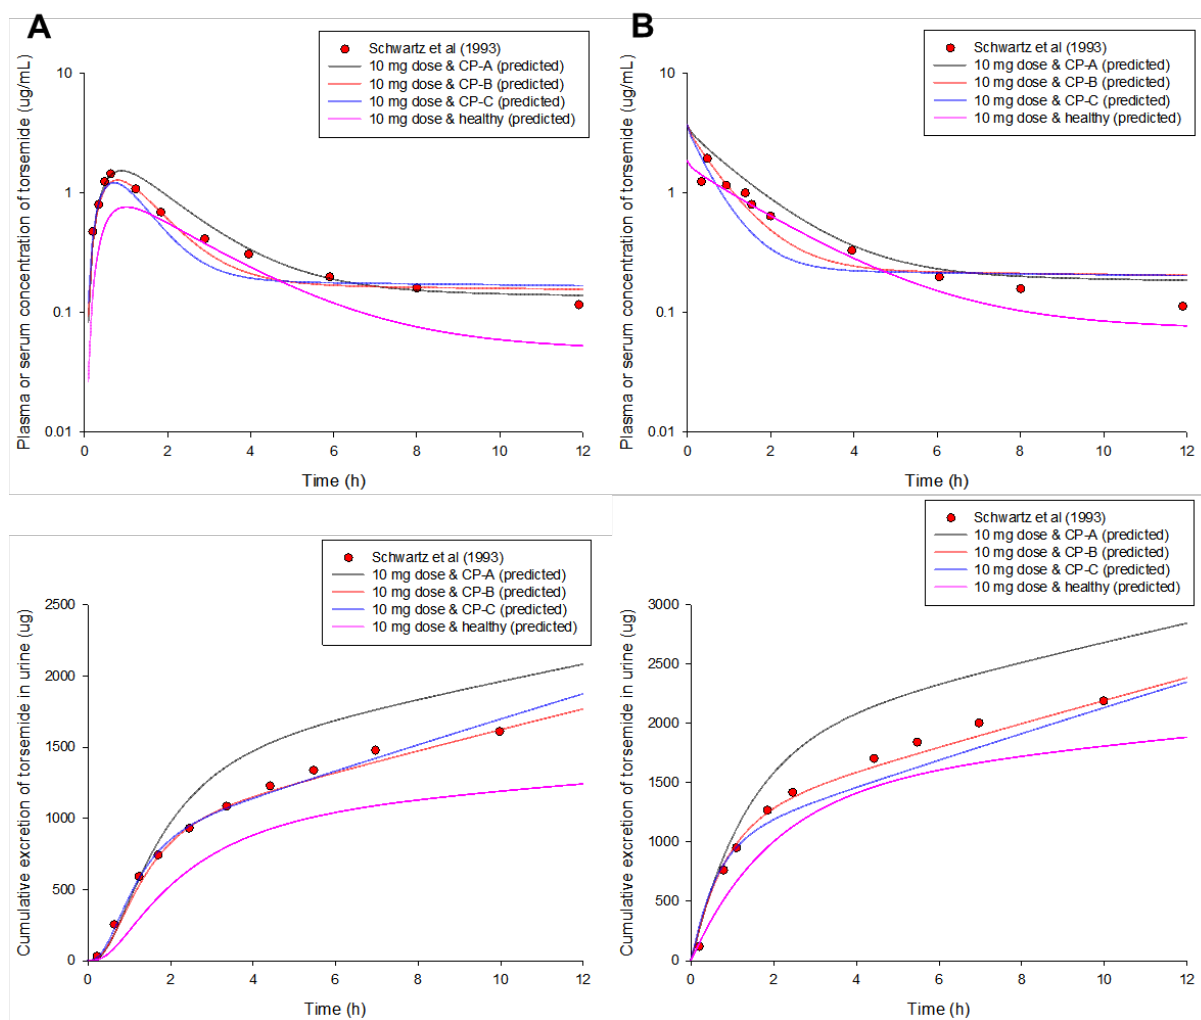

**Figure S11**

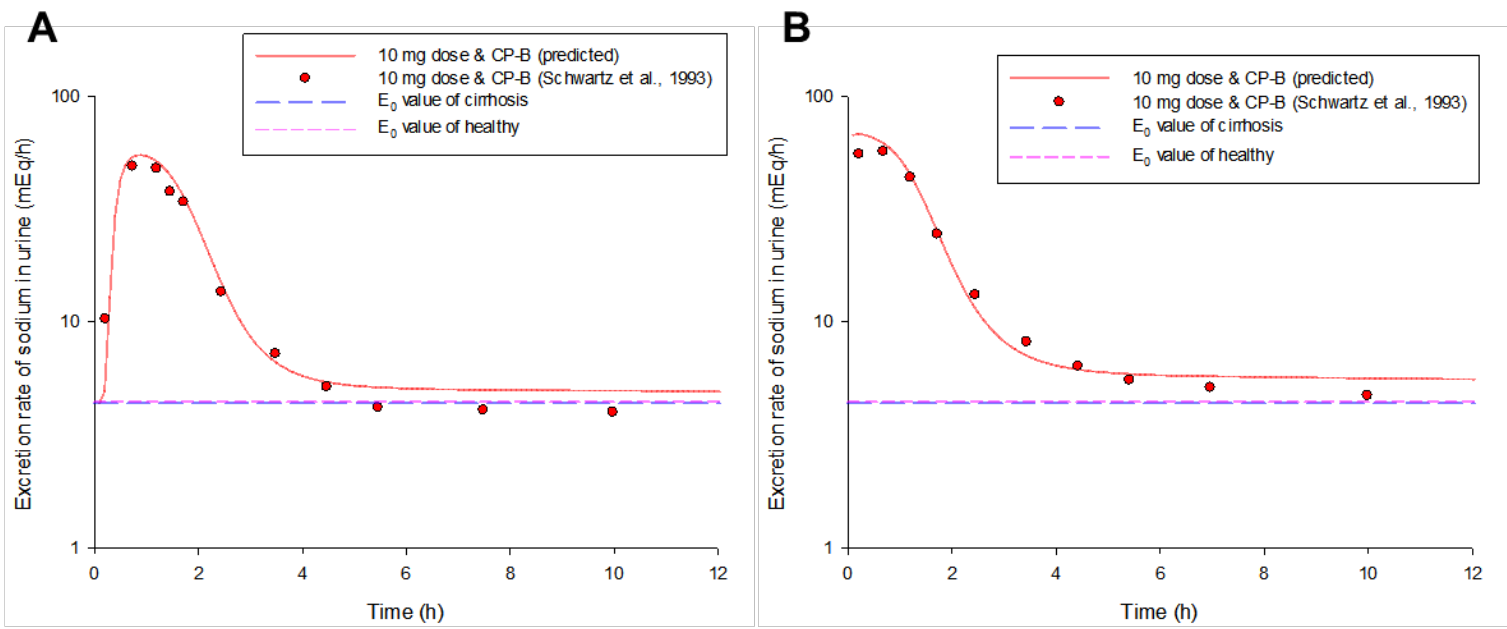

**Figure S12**

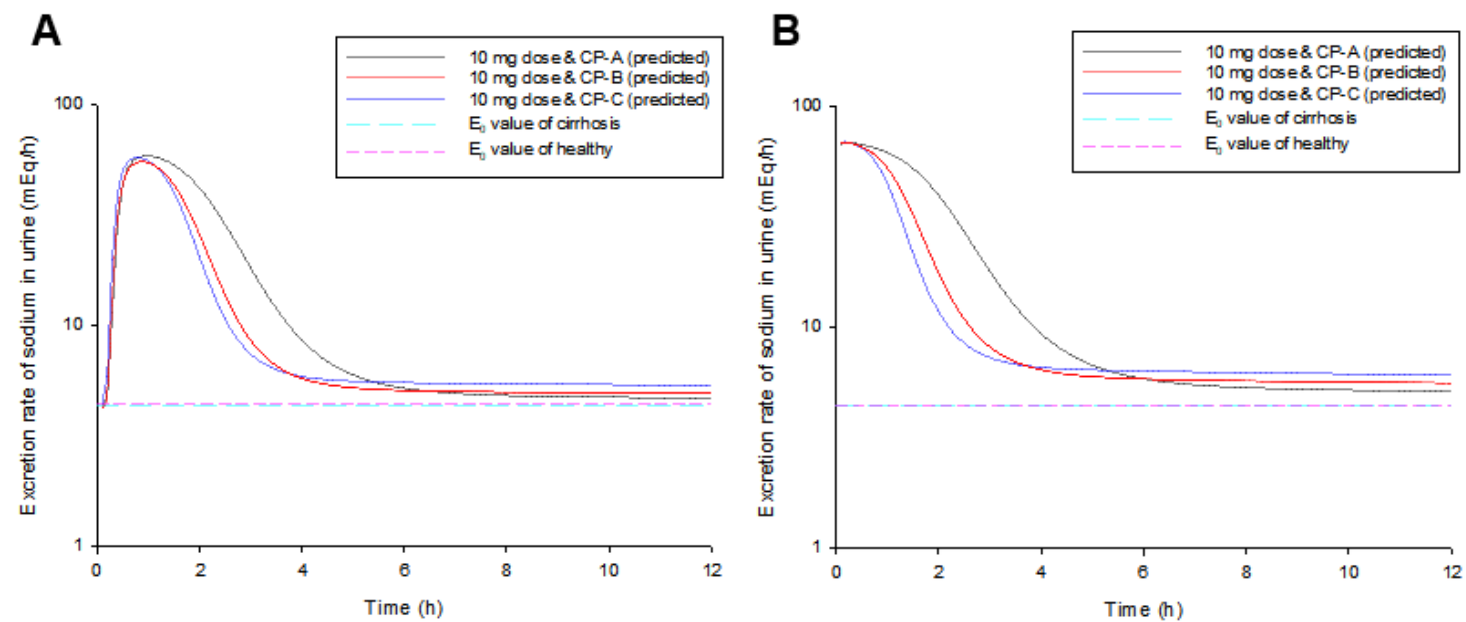

**Figure S13**

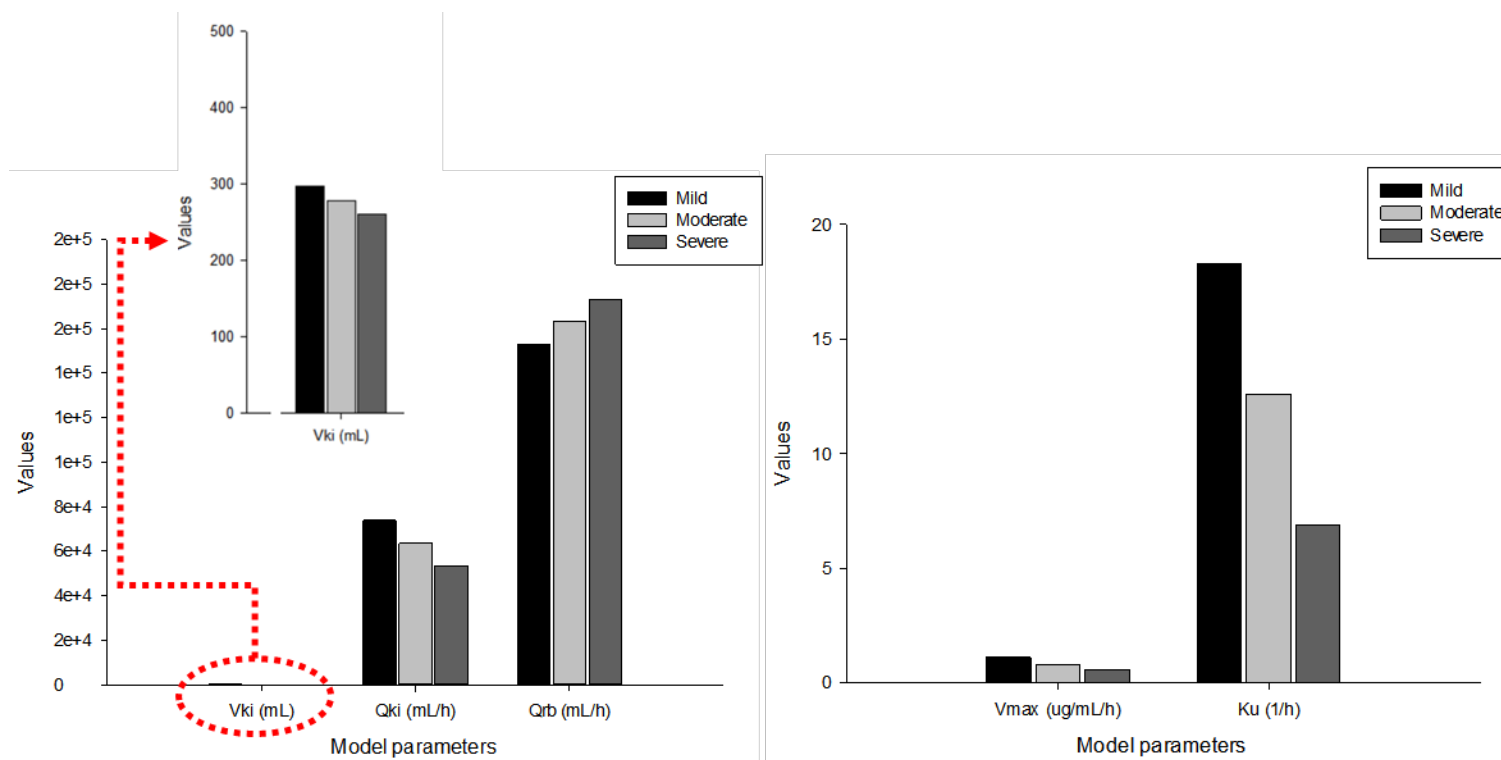

**Figure S14**

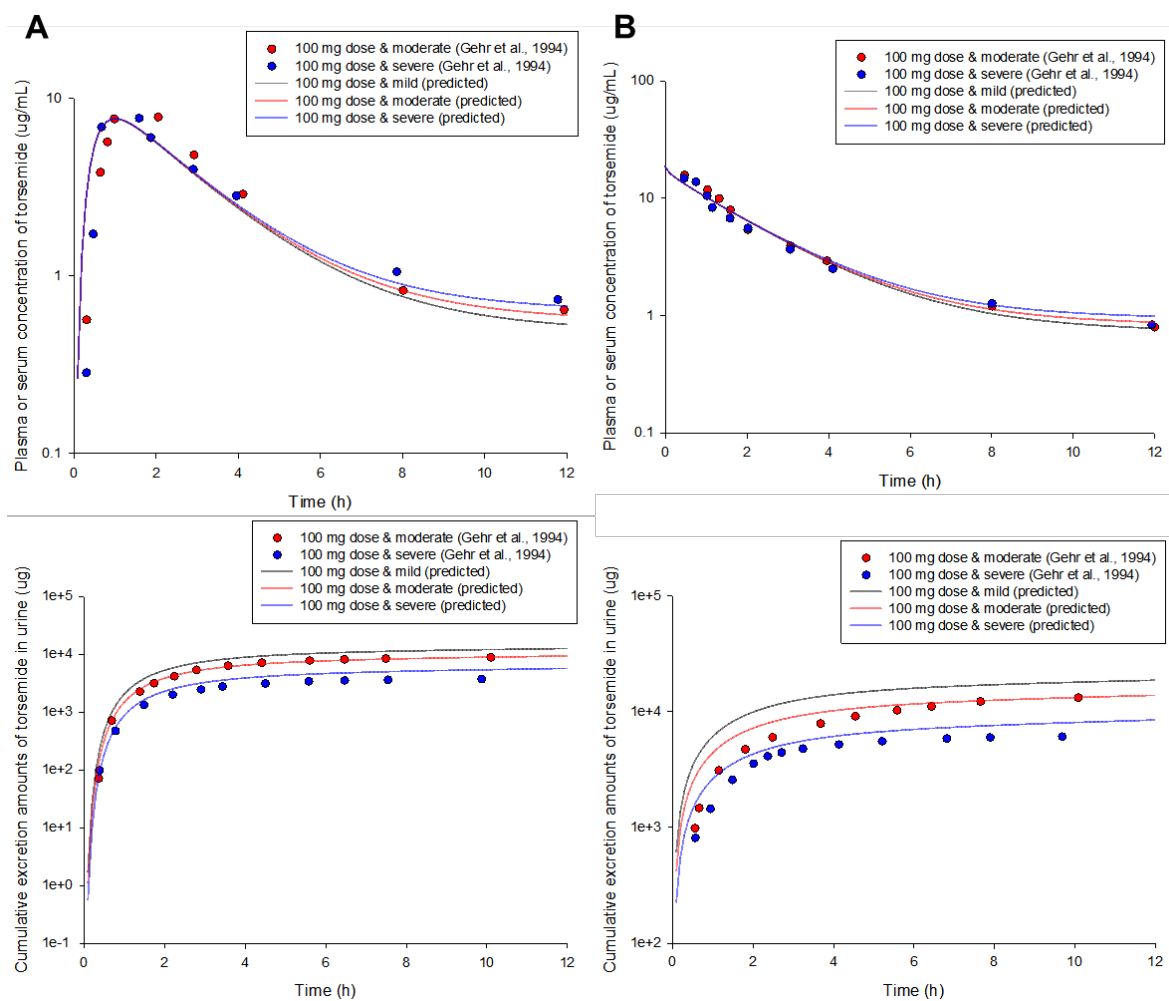

**Figure S15**

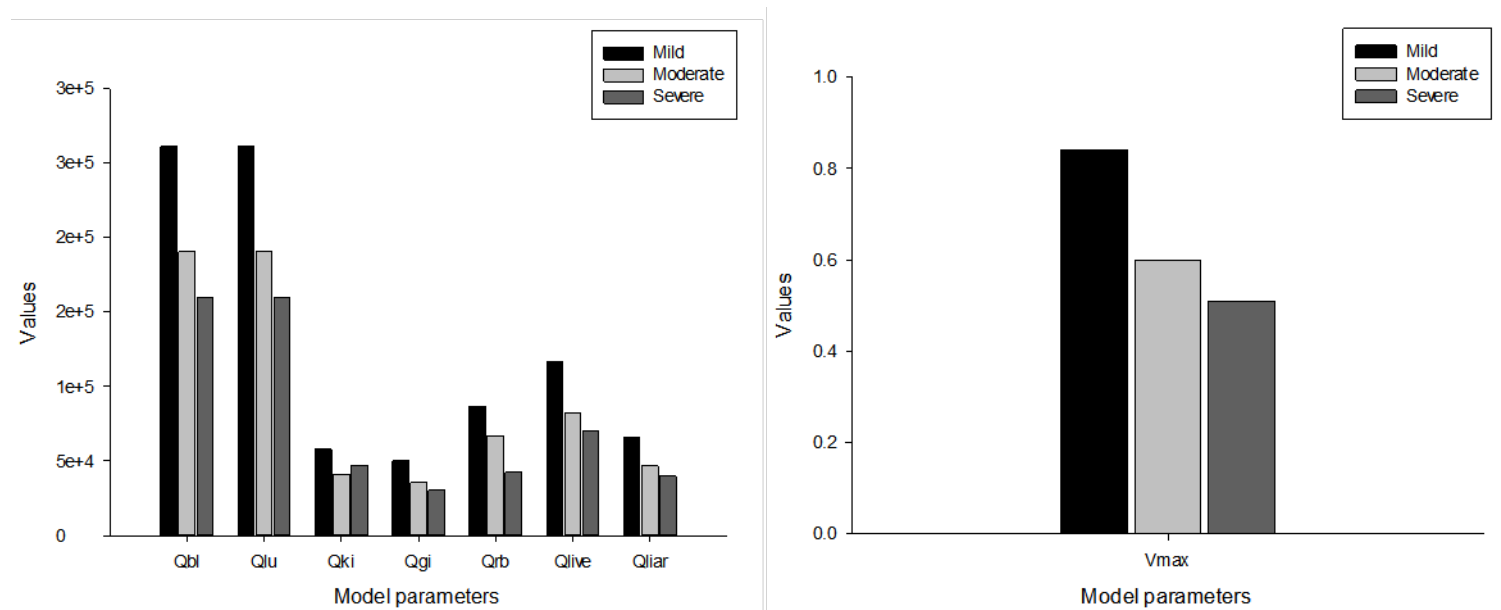

Figure S16



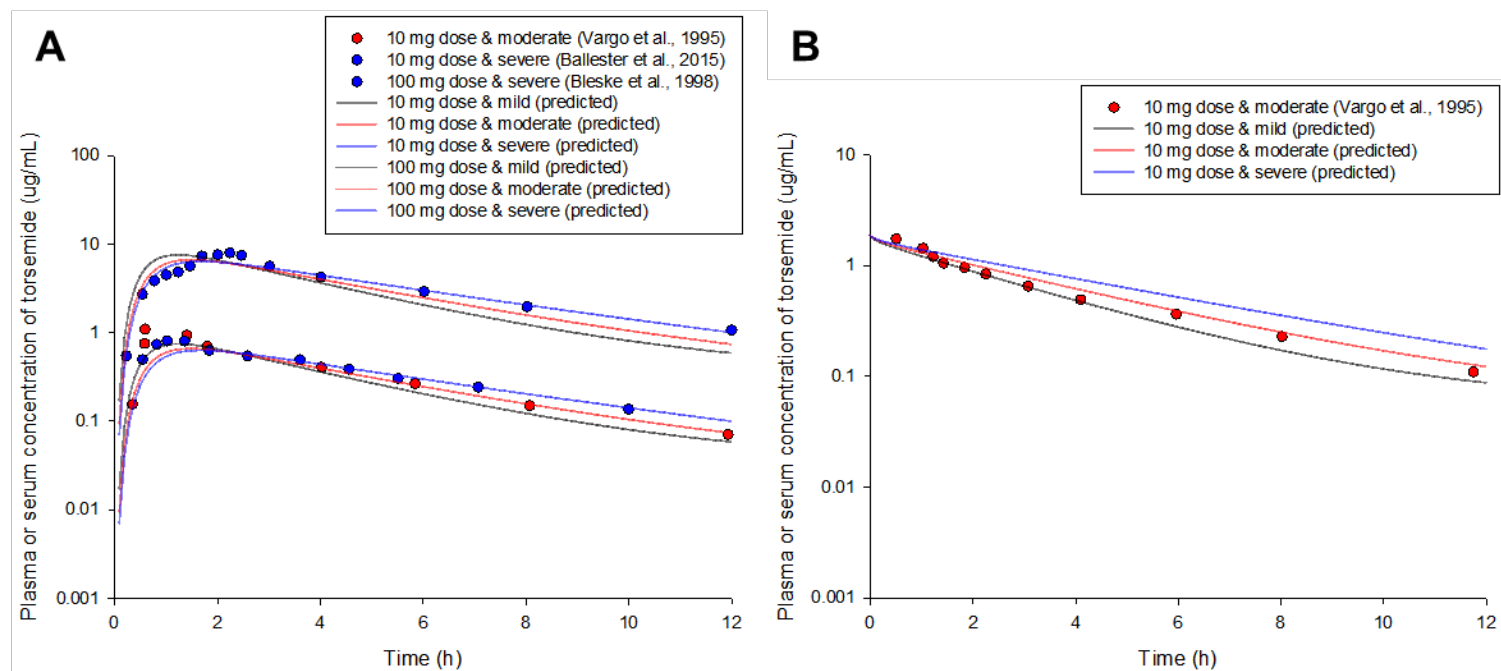

**Figure S17**

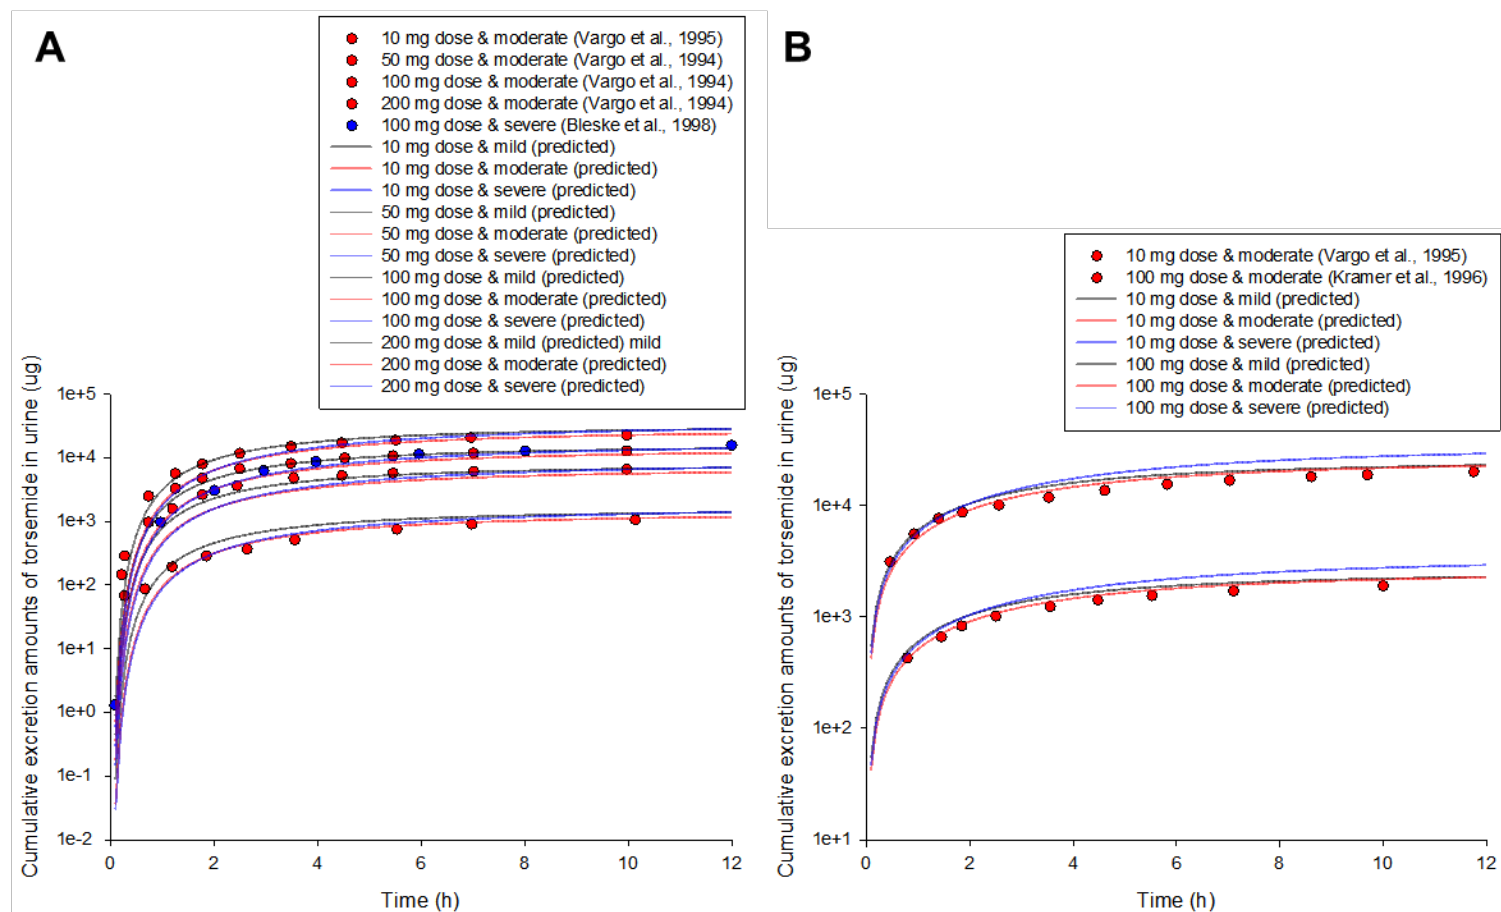

**Figure S18**

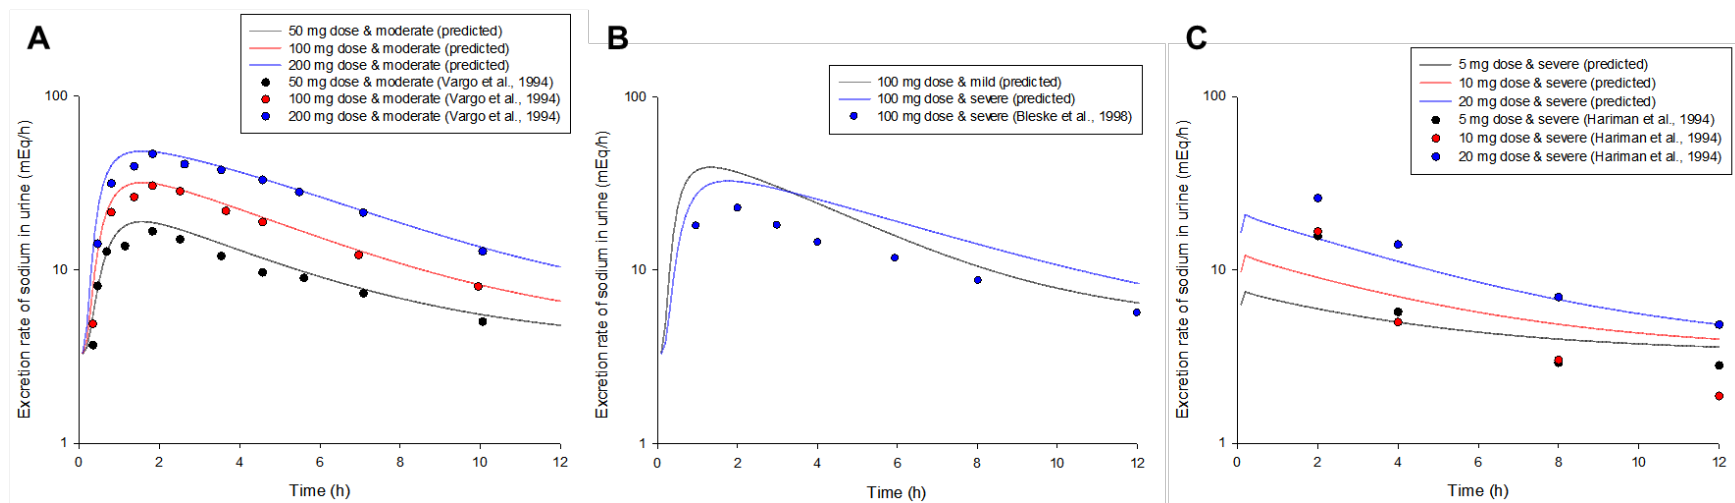

**Figure S19**

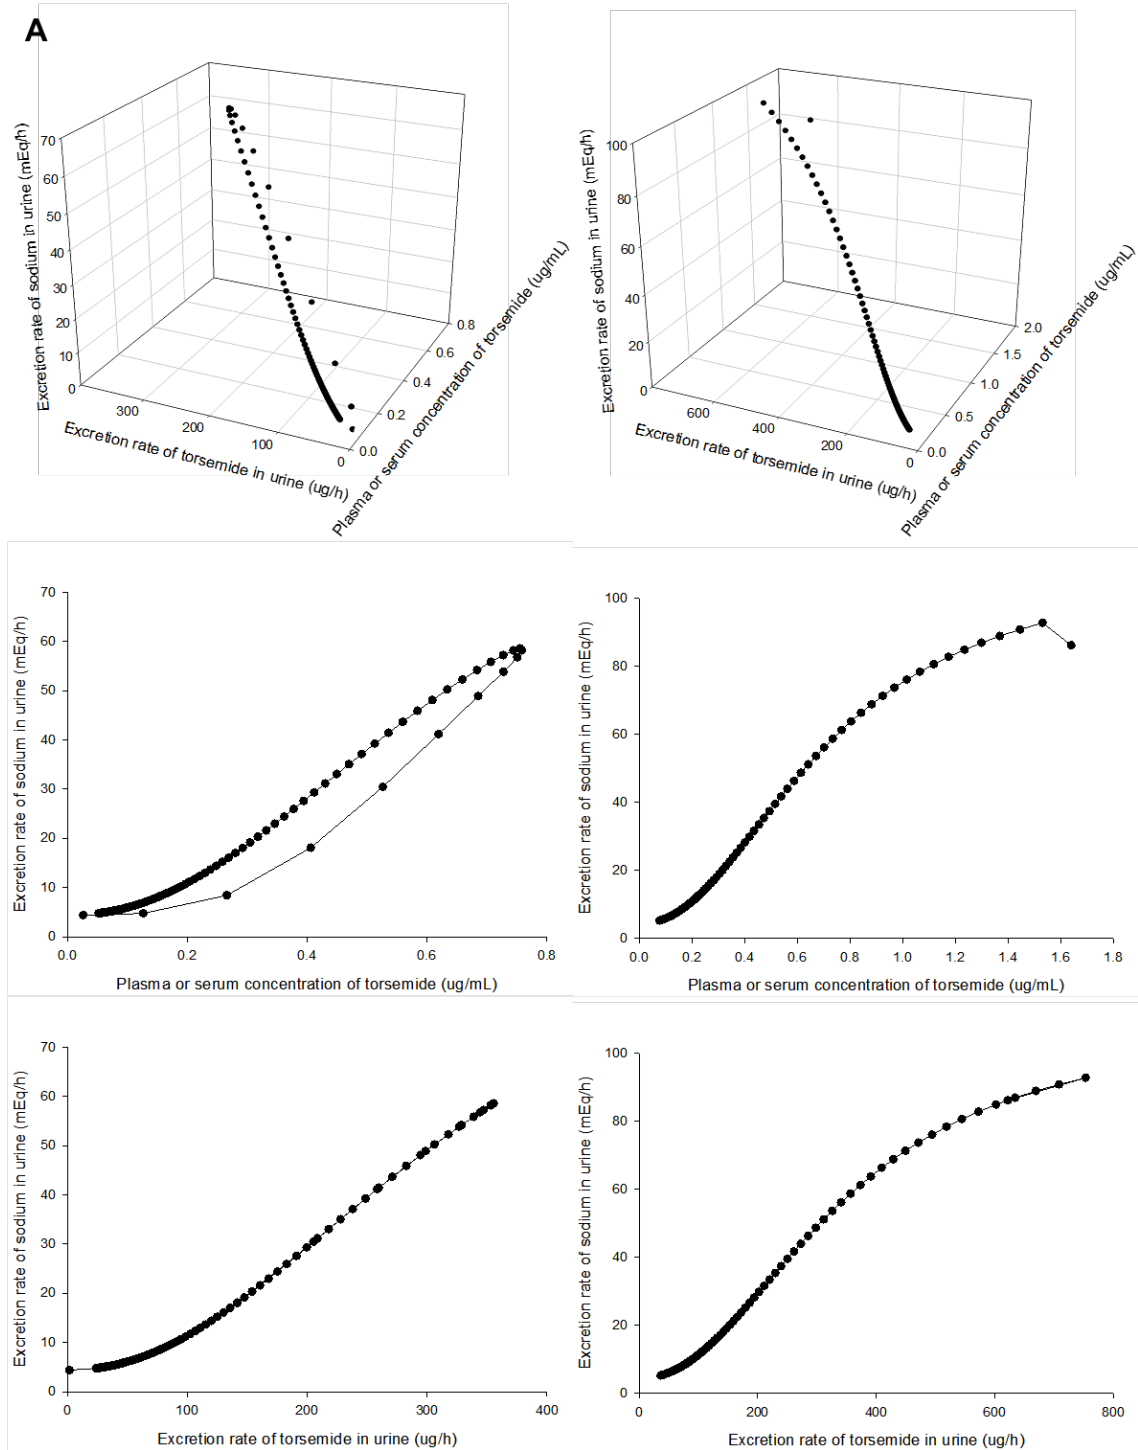

**Figure S20 (continued)**

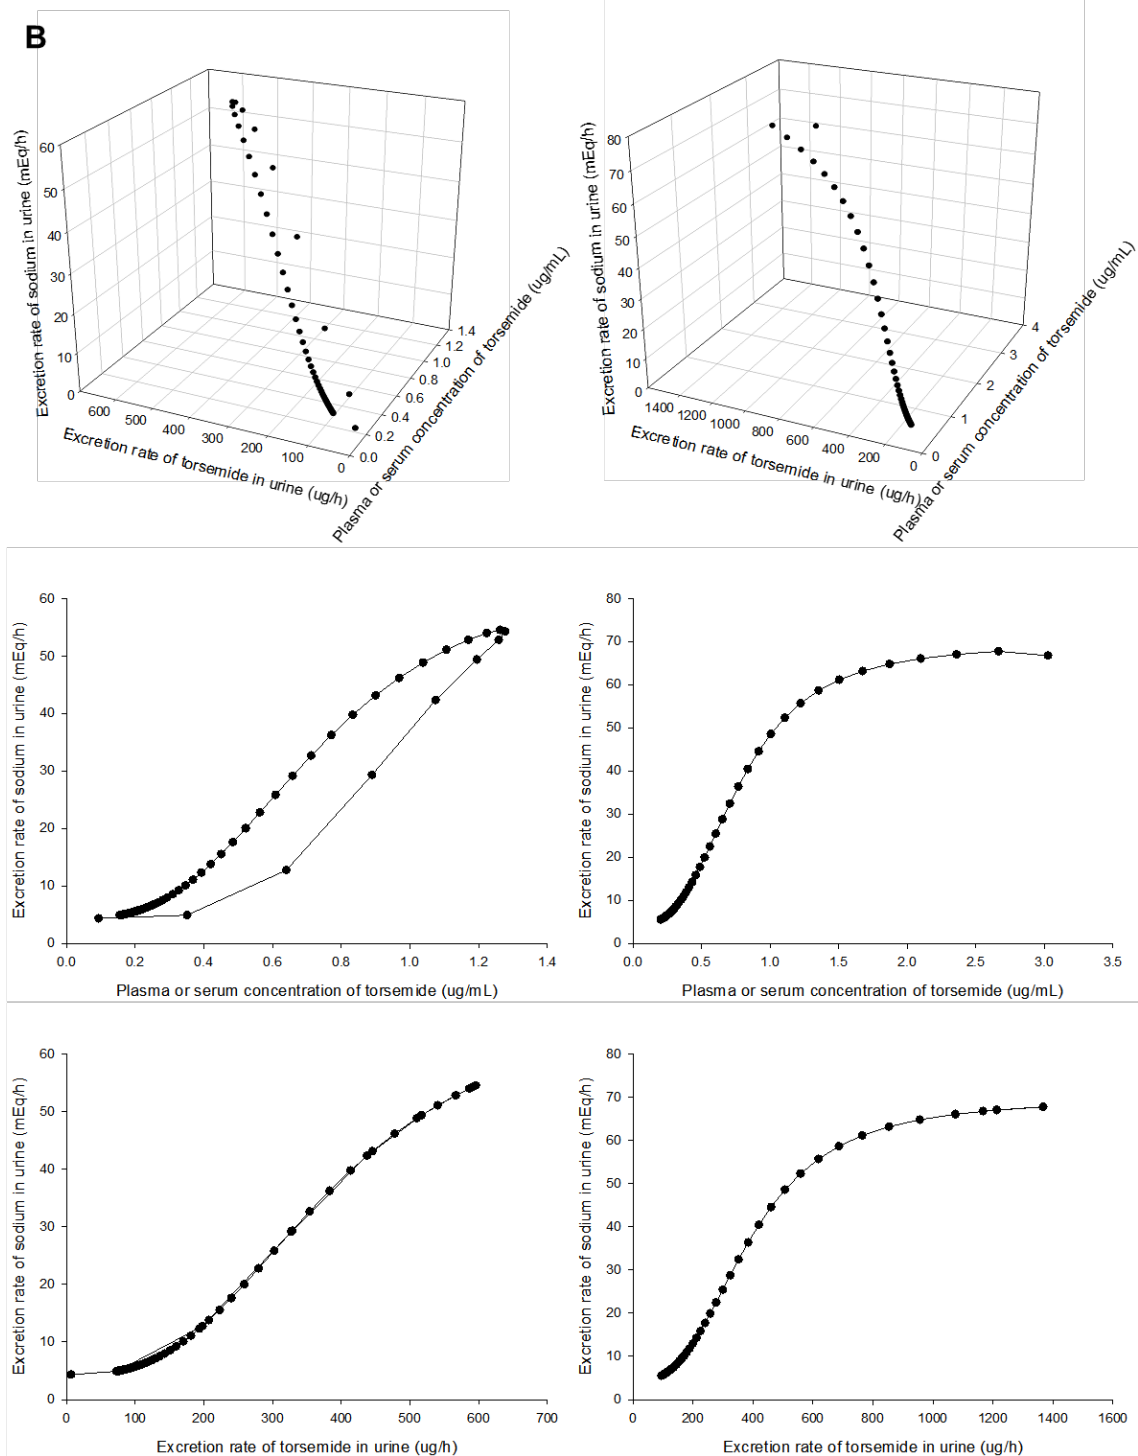

**Figure S20 (continued)**

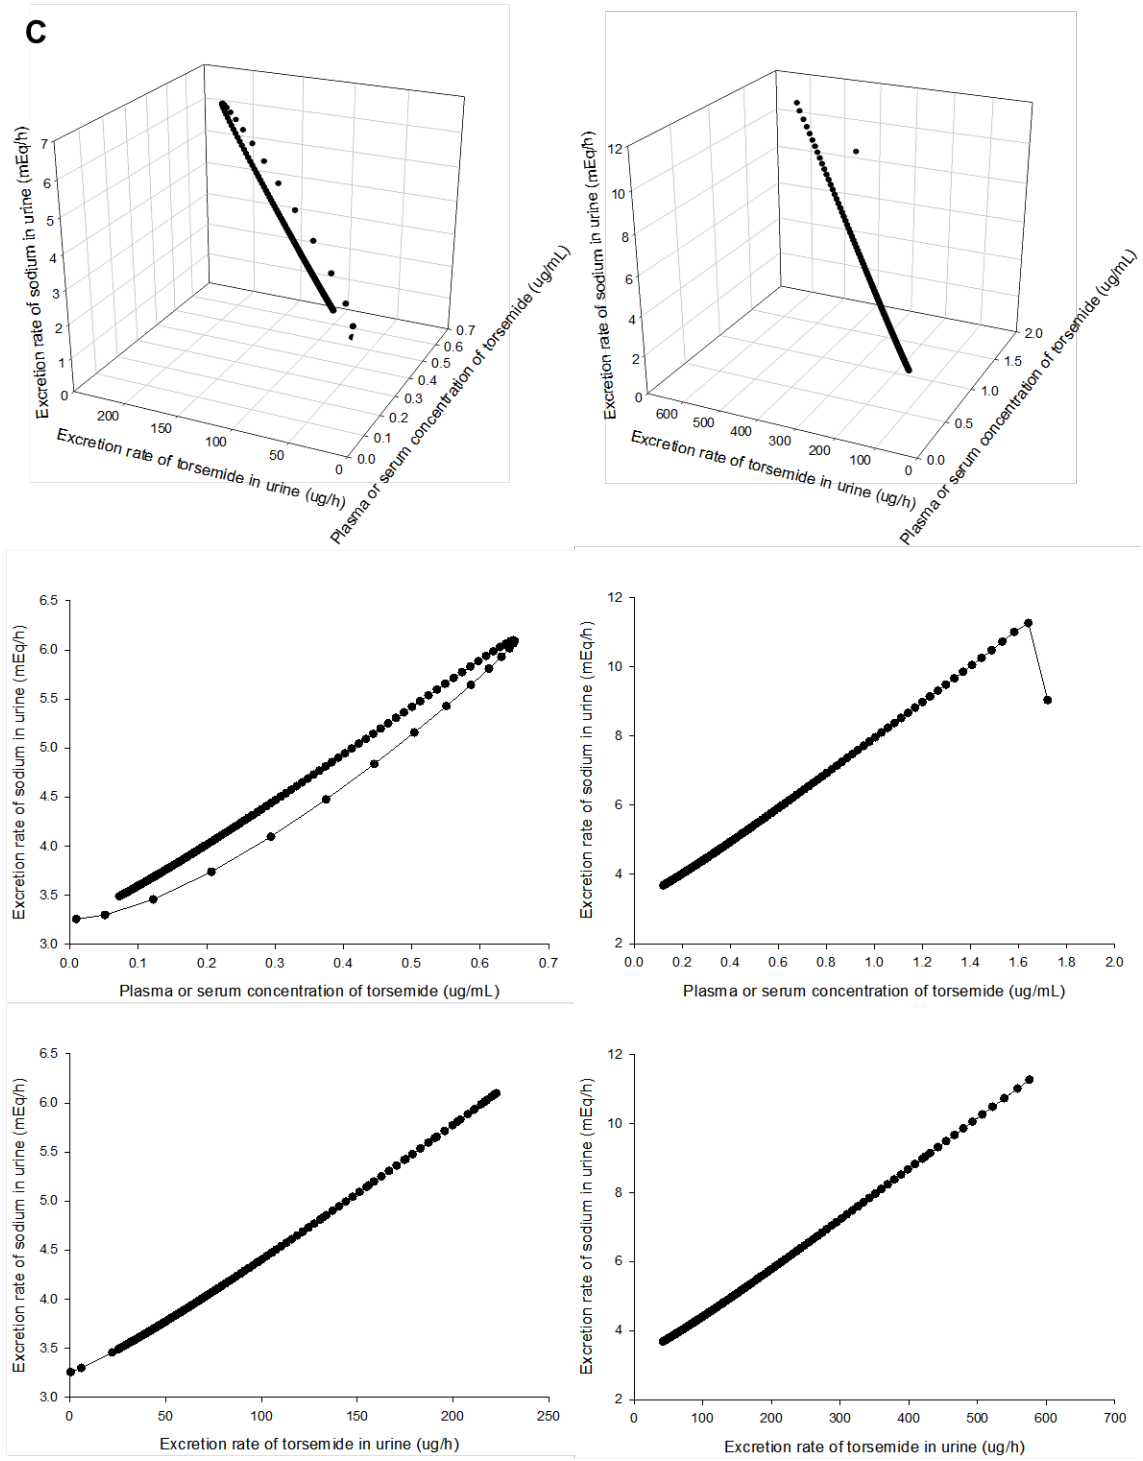

**Figure S20**

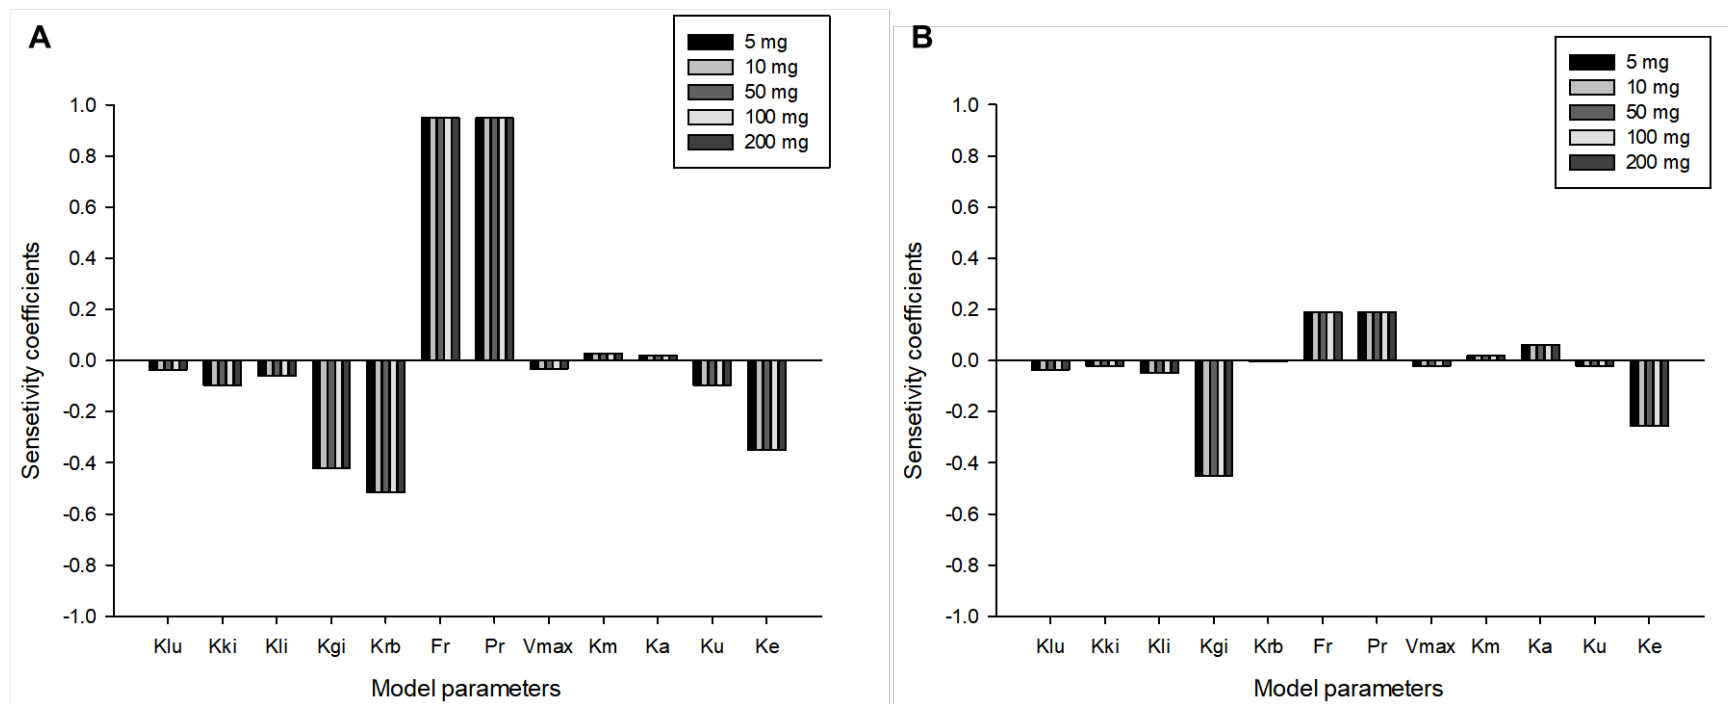

**Figure S21**
